# Effect of a carbon source on polyphosphate accumulation in *Saccharomyces cerevisiae*

Vladimir M. Vagabov, Ludmila V. Trilisenko, Tatiana V. Kulakovskaya &amp; Igor S. Kulaev

Skryabin Institute of Biochemistry and Physiology of Microorganisms, Russian Academy of Sciences, Pushchino, Moscow, Russia

**Correspondence:** Tatiana V. Kulakovskaya, Skryabin Institute of Biochemistry and Physiology of Microorganisms, Russian Academy of Sciences, Pushchino 142290, Moscow region, Russia. Tel.: 095 9563370; e-mail: alla@ibpm.pushchino.ru

Received 13 November 2007; revised 9 June 2008; accepted 20 June 2008.  
First published online 18 July 2008.

DOI:10.1111/j.1567-1364.2008.00420.x

Editor: Monique Bolotin-Fukuhara

## Keywords

inorganic polyphosphate; carbon source; phosphate overplus; glycolysis; oxidative phosphorylation; *Saccharomyces cerevisiae*.

## Introduction

Inorganic polyphosphate (polyP), a linear polymer of many phosphate residues linked by high-energy phosphoanhydride bonds, performs varied functions in microorganisms including yeast, such as phosphate and energy reservation, regulation of enzyme activities, formation of membrane channels, sequestration and storage of cations, and gene activity control (Kulaev & Vagabov, 1983; Reusch, 1992; Kornberg, 1995; Docampo & Moreno, 2001; Kulaev *et al.*, 2004).

Yeast cells are characterized by high level and multiple localization of polyP (Kulaev & Vagabov, 1983; Lichko *et al.*, 2006). Chemical fractionation of polyP from the cells of *Saccharomyces cerevisiae* makes it possible to obtain five separate fractions of these biopolymers: acid-soluble fraction polyP1, salt-soluble fraction polyP2, weakly alkali-soluble fraction polyP3, alkali-soluble fraction polyP4 and, finally, fraction polyP5, which is assessed by the amount of P<sub>i</sub> appearing after the hydrolysis of residual material in 0.5 N HClO<sub>4</sub> at 90 °C (Vagabov *et al.*, 2000). The synthesis and

## Abstract

The cells of *Saccharomyces cerevisiae* accumulate inorganic polyphosphate (polyP) when reinoculated on a phosphate-containing medium after phosphorus starvation. Total polyP accumulation was similar at cultivation on both glucose and ethanol. Five separate fractions of polyP: acid-soluble fraction polyP1, salt-soluble fraction polyP2, weakly alkali-soluble fraction polyP3, alkali-soluble fraction polyP4, and polyP5, have been obtained from the cells grown on glucose and ethanol under phosphate overplus. The dynamics of polyP fractions depend on a carbon source. The accumulation rates for fractions polyP2 and polyP4 were independent of the carbon source. The accumulation rates of polyP1 and polyP3 were higher on glucose, while fraction polyP5 accumulated faster on ethanol. As to the maximal polyP levels, they were independent of the carbon source for fractions polyP2, polyP3, and polyP4. The maximal level of fraction polyP1 was higher on glucose than on ethanol, but the level of fraction polyP5 was higher on ethanol. It was assumed that accumulation of separate polyP fractions has a metabolic interrelation with different energy-providing pathways. The polyphosphate nature of fraction polyP5 was demonstrated for the first time by <sup>31</sup>P nuclear magnetic resonance spectroscopy, enzymatic assay, and electrophoresis.

degradation of these fractions are closely related to metabolic processes in individual cell compartments, and their dynamics is affected in different ways by changing the culture conditions. For example, there are correlations between the synthesis of polyP4 and cell envelope manno-proteins mediated by dolichyl-diphosphate:polyphosphate phosphotransferase (Kulaev *et al.*, 1987) and between RNA synthesis and polyP2 fraction accumulation (Kulaev & Vagabov, 1983).

Because polyP is a compound with high-energy bonds, their metabolism depends considerably on the energy-converting processes in cells. Recently, 255 genes were found to be involved in the maintenance of polyP content in the cells of *S. cerevisiae* (Freimoser *et al.*, 2006). These data confirm the idea of the participation of polyP in cellular energy homeostasis.

Under growth on glucose, even under high aeration, the main mechanism of supplying energy for all metabolic processes in *S. cerevisiae* cells is glycolysis, while respiration and oxidative phosphorylation provide energy under growth on nonfermentable substrates such as ethanol (De

Deken, 1966; Pronk *et al.*, 1996; Merico *et al.*, 2007). These physiological peculiarities make *S. cerevisiae* a good model for studying the effects of energy metabolism on polyP accumulation and usage.

Under short-time cultivation on ethanol, the cells of *S. cerevisiae* accumulated less acid-insoluble polyP than under cultivation on glucose (Schuddemat *et al.*, 1989). In both cases, low-molecular polymers were synthesized first and high-molecular polyP appeared later. However, the effects of a carbon source on accumulation of all the diversities of polyP fractions in *S. cerevisiae* cells are still unknown. The goal of this study is to compare the peculiarities of synthesis of different polyP fractions in *S. cerevisiae* under growth on glucose and ethanol.

## Materials and methods

### Yeast strain and culture conditions

The yeast *S. cerevisiae* strain VKM Y-1173 was grown in a shaker (200 r.p.m.) in Reader medium containing 2% glucose or 1% ethanol as carbon sources and other components (Vagabov *et al.*, 2000). In phosphate-free medium, potassium phosphate was replaced by KCl and yeast extract by inositol (2 mg L<sup>-1</sup>), respectively.

The yeast was first cultivated to the early logarithmic growth stage in a complete medium containing 9 mM P<sub>i</sub>. Then the cells were harvested, placed in phosphate-free medium, and grown for 7 h. Later, the cells were again placed on fresh complete medium, where the culture was grown for 3.5 h. During the cultivation, biomass samples were harvested at 3000 g for 10 min, washed twice by distilled water at 4 °C, and used for polyP extraction. Dry cell mass was determined after drying of cell aliquots at 85 °C under vacuum.

### Extraction and assay of polyP fractions

PolyP were extracted and assayed as described (Vagabov *et al.*, 2000). On the basis of our previous studies (Vagabov *et al.*, 1998; Kulaev *et al.*, 1999), we consider this extraction method to be one of the best available for separation and quantitative determination of polyP fractions from the yeast cells. PolyP was most completely extracted by this method (Vagabov *et al.*, 1998; Kulaev *et al.*, 1999). Acid-soluble polyphosphates polyP1 were extracted by 0.5 N HClO<sub>4</sub> at 0 °C. Salt-soluble polyphosphates polyP2 were extracted by a saturated solution of NaClO<sub>4</sub> at 0 °C. Two fractions of alkali-soluble polyphosphates (polyP3 and polyP4) were extracted at 0 °C with weak NaOH (pH of the solution was adjusted to 9–10) and 0.05 M NaOH (pH 12), respectively. The polyP level in the fractions was estimated as a difference in P<sub>i</sub> amount before and after the hydrolysis of samples in 1 N HCl for 10 min at 100 °C

(Vagabov *et al.*, 2000). The level of polyP5 fraction was determined by the treatment of residual material with 0.5 N HClO<sub>4</sub> at 90 °C twice for 20 min, and the assay of released P<sub>i</sub>. P<sub>i</sub> was determined according to Weil-Malherbe & Green (1951). The data in the tables and figures are average values of three experiments.

### <sup>31</sup>P nuclear magnetic resonance (NMR) spectroscopy of polyP5 fraction

After removal of polyP1, polyP2, polyP3, and polyP4 fractions, residual material was suspended in distilled water, neutralized with 0.1 N HCl, and EDTA was added to a final concentration of 30 mM.

<sup>31</sup>P-NMR spectra were recorded by an Avance 600 spectrometer (242.9 MHz, 45° pulse, and 1 s delay) in 5-mm standard NMR ampoules. The scan number was 500. The solution of disodium salt of ethylenediaminephosphonic acid with a chemical shift of 12.8 p.p.m. relative to 85% H<sub>3</sub>PO<sub>4</sub> was used as a standard. The signal of –21.61 p.p.m. is typical of core phosphate groups of polyP (Vagabov *et al.*, 1998).

### Enzymatic assay of polyP

After removal of polyP1, polyP2, polyP3, and polyP4 fractions, residual material was suspended in distilled water, neutralized with 0.1 N HCl, and used for enzymatic assay. The reaction mixture contained 1 mL of 50 mM Tris-HCl, pH 7.2, 2.5 mM MgSO<sub>4</sub>, 0.1 mL of the above suspension, and 0.1 mL of exopolyphosphatase preparation (1 E mL<sup>-1</sup>). After incubation at 30° for 30–40 min, the level of polyP was estimated by the amount of P<sub>i</sub> released. Pure yeast exopolyphosphatase (Andreeva *et al.*, 2006) was kindly provided by Dr N.A. Andreeva (IBPM RAS).

### Electrophoresis of polyP

Fractions polyP1, polyP2, polyP3, and polyP4 were subjected to electrophoresis in 20% polyacrylamide gel with 7 M urea. As for fraction polyP5, after removal of polyP1, polyP2, polyP3, and polyP4 fractions, residual material was suspended in distilled water, neutralized with 0.1 N HCl, and, after centrifugation at 3000 g for 10 min, the supernatant was subjected to electrophoresis. The gels were stained with 0.05% toluidine blue, 25% methanol, and 1% glycerol, followed by destaining in 25% methanol and 5% glycerol (Pepin & Wood, 1986).

## Results and discussion

### PolyP accumulation after phosphate starvation

The reinoculation of yeast cells after phosphate starvation to a complete P<sub>i</sub> medium resulted in the accumulation of polyP

to a level several times higher than in the cells grown on complete medium without  $P_i$  starvation. This accumulation is known as 'hypercompensation' or 'phosphate overplus' (Liss & Langen, 1962; Kulaev & Vagabov, 1983; Kulaev *et al.*, 2004).

The yeast *S. cerevisiae* was grown in the media with glucose or ethanol to the beginning of logarithmic growth phase and then the cells were reinoculated in the media without  $P_i$ , and cultivated for 7 h (Fig. 1a). In spite of  $P_i$

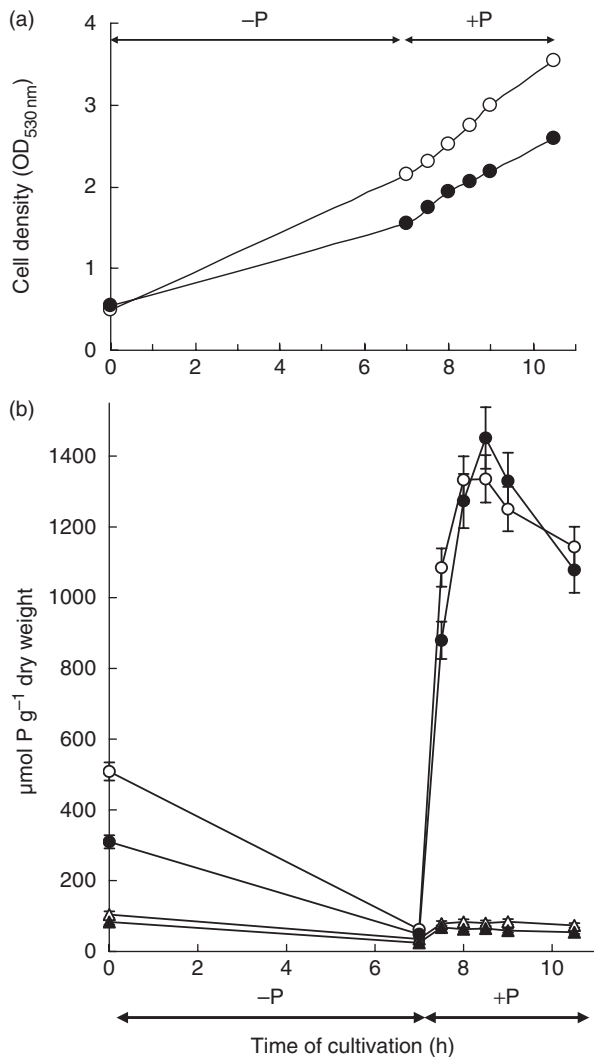

**Fig. 1.** (a) Growth of *Saccharomyces cerevisiae* VKM Y-1173 in a medium with 2% glucose (O) or 1% ethanol (●), 0–7 h, phosphate starvation; 7–10.5 h, phosphate overplus. The mean values of three determinations with SD of 5% are shown. (b) PolyP and  $P_i$  content in the cells of *S. cerevisiae* on phosphate starvation (0–7 h) and phosphate overplus (7–10.5 h): (○) total polyP content under growth on glucose, (●) total polyP content under growth on ethanol, (Δ)  $P_i$  content under growth on glucose, (▲)  $P_i$  content under growth on ethanol. The mean values of three determinations are shown.

absence in the media, the biomass amount increased four- and threefold in the media with glucose and ethanol, respectively (Fig. 1a). During the growth in  $P_i$ -free media, yeast cells used polyP as an intracellular phosphate source (Fig. 1b). The decrease of the total polyP content at  $P_i$  starvation was independent of the carbon source used. As for separate fractions, their content also decreased independent of the carbon source used.

Then  $P_i$ -starved cells were reinoculated into complete media. The growth curves are shown in the Fig. 1a. This reinoculation resulted in polyP accumulation while  $P_i$  levels changed little (Fig. 1b). This suggests that in order to maintain a fairly constant level of  $P_i$  in the cells, the  $P_i$  excess was converted into polyP. Yet, after 0.5 h of cultivation in  $P_i$ -containing medium with glucose, the total level of polyP increased more than twofold as compared with control (0 h, Fig. 1b) and polyP accumulation continued for 1.5 h (Fig. 1b). Then the polyP level decreased. After 0.5 h of cultivation in  $P_i$ -containing medium with ethanol, the total level of polyP increased by nearly threefold as compared with control (0 h, Fig. 1b) and reached the maximum after 1.5 h of cultivation. Then the polyP level decreased as well. As a whole, the total polyP content during phosphate starvation and phosphate overplus change in a similar manner under growth on glucose and ethanol.

Figure 2 shows the dynamics of polyP accumulation in different fractions on growth on glucose and ethanol under phosphate overplus. The rates of accumulation for the first 0.5 h of cultivation in complete medium for fractions polyP2 and to a lesser extent polyP4 were independent of the carbon source. Fractions polyP1 and polyP3 exhibit the maximal accumulation rate at cultivation on glucose, while fraction polyP5 exhibit the maximal accumulation rate on cultivation on ethanol (Fig. 2).

The maximal levels of fractions polyP2, polyP3, and polyP4 did not depend on the carbon source used (Fig. 2). The maximal level of fraction polyP1 was higher on glucose than on ethanol, but that of fraction polyP5 was higher on ethanol.

PolyP3 and polyP5 were the most metabolically active fractions on both ethanol and glucose. Their levels decreased after 1–1.5 h of growth under phosphate overplus (Fig. 2). Thus, these fractions are most likely an energy source under growth in  $P_i$ -containing medium.

It is not unlikely that the accumulation of separate polyP fractions is provided by different energy sources. We suppose that the accumulation of polyP1 was probably mediated mainly by glycolysis, while that of polyP5 was mediated mainly by oxidative phosphorylation.

The electrophoresis in polyacrylamide gel electrophoresis (PAGE) demonstrates the difference in chain length of

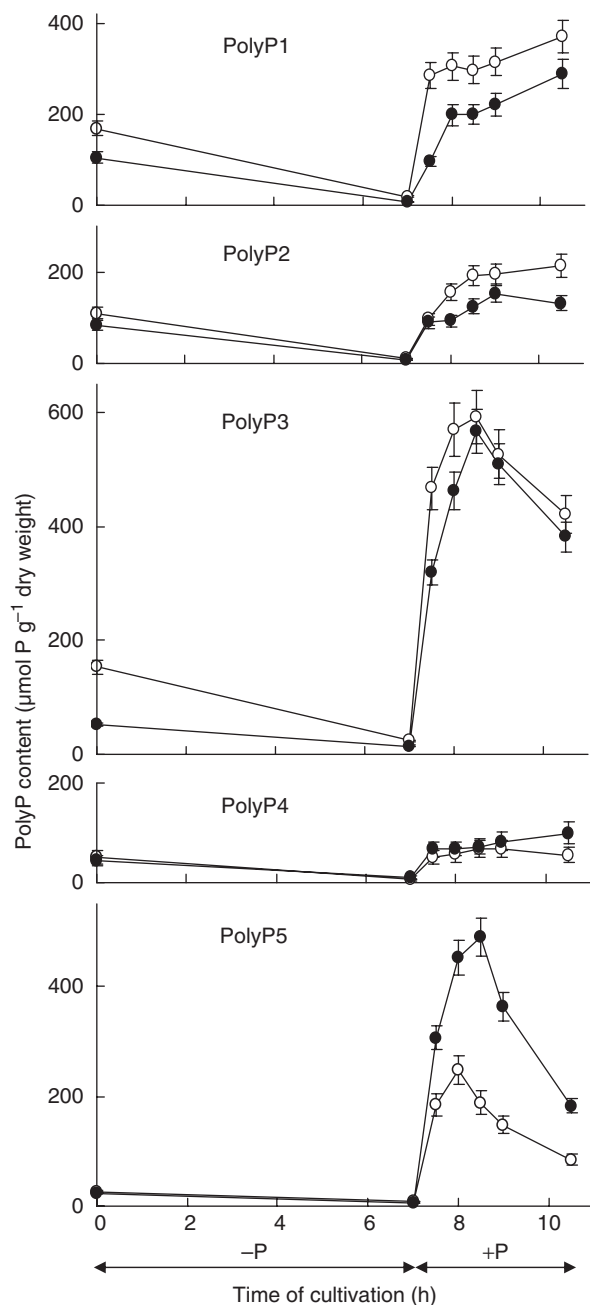

**Fig. 2.** Content of separate polyP fractions in the cells of *Saccharomyces cerevisiae* on phosphate starvation (0–7 h) and phosphate overplus (7–10.5 h). The culture media contained glucose (○) or ethanol (●). The mean values of three determinations are shown.

separate polyP fractions (Fig. 3). Earlier, similar data were obtained by  $^{31}\text{P}$ -NMR spectroscopy during the course of growth in a medium with glucose (Vagabov *et al.*, 2000). The average chain lengths of polyP of different fractions were not affected by the carbon source used under culture conditions (Fig. 3).

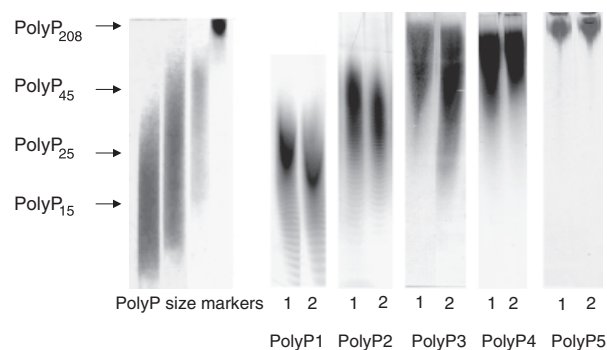

**Fig. 3.** Electrophoregram of polyP in 20% polyacrylamide gel in the presence of 7 M urea. PolyP standards with an average chain length of 15–208 phosphate residues were used (Sigma); polyP fractions were obtained from the cells *Saccharomyces cerevisiae* grown under phosphate overplus conditions for 0.5 h on glucose (1) and ethanol (2). PolyP5 fraction was obtained as described in Materials and methods.

### Evidences of polyphosphate nature of polyP5 fraction

Previously, the level of polyP5 was estimated by  $\text{P}_i$  amount through the treatment of residual material after the extraction of polyP1–polyP4 by 0.5 N  $\text{HClO}_4$  at 90 °C. There was no proper evidence of the polyP nature of this fraction, because its content was rather low (5–7% of total polyP in the cells) (Vagabov *et al.*, 2000). At growth on ethanol and under phosphate overplus, the content of polyP5 increased to 30% of total polyP.

In this study, we have demonstrated for the first time that the phosphorus compounds of fraction polyP5 are long-chain inorganic polyphosphates, using  $^{31}\text{P}$ -NMR spectroscopy, electrophoresis, and enzymatic assay. For these assays, the material remaining after the extraction of polyP1–polyP4 was treated as described in Materials and methods. Figure 3 demonstrates the electrophoregram of polyP5 fraction in 20% PAGE. Its chain length was maximal among the polyP fractions under study. Figure 4 shows  $^{31}\text{P}$ -NMR spectrum of polyP5, which corresponds to the high-molecular polyP signal at 21.6 p.p.m. (Vagabov *et al.*, 1998; Kulaev *et al.*, 2004)  $\text{P}_i$  was released as a result of treatment of residual material by pure high-molecular cytosol exopolyphosphatase, which is specific to long-chain polyP (Andreeva *et al.*, 2006). If the time of treatment was long enough, all the labile phosphorus of this fraction was converted into  $\text{P}_i$ . PolyP was not observed under electrophoresis after this treatment. Thus, a strong evidence of the polyP nature of fraction polyP5 has been obtained.

The pathways of polyP biosynthesis in yeasts require further investigations. Considerable synthesis of polyP from ATP was shown in *Candida humicola* (McGrath *et al.*, 2005) while in *S. cerevisiae* the reverse reaction prevailed (Shabalin

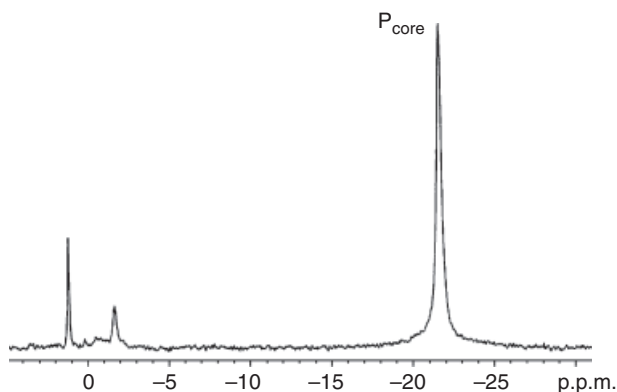

**Fig. 4.**  $^{31}\text{P}$  nuclear magnetic resonance spectrum of the polyP5 fraction obtained from *S. cerevisiae* cells as described in Electrophoresis of polyP.  $\text{P}_{\text{core}}$  indicates the resonance signal of inner phosphate groups of long-chain polyP.

*et al.*, 1977). No gene encoding polyphosphate kinase was found in the *S. cerevisiae* genome (Zhang *et al.*, 2002). The participation of 1,3-diphosphoglucerate polyphosphate phosphotransferase, an enzyme using substrate phosphorylation for polyP and not ATP synthesis, and dolychil polyphosphate kinase in polyP accumulation in *S. cerevisiae* cell is still unclear (Kulaev *et al.*, 2004). Some indirect evidences assume that electrochemical proton gradients on cell membranes support polyP accumulation (Trilisenko *et al.*, 2003; Pestov *et al.*, 2004). The carbon source effect that we observed led us to postulate that the accumulation of different polyP fractions in *S. cerevisiae* cells has a metabolic interrelation with different energy-providing pathways.

## Acknowledgements

We thank Dr V.P. Kutysenko for  $^{31}\text{P}$ -NMR spectroscopy and E.V. Makeeva for help with the preparation of the manuscript. The work was supported by a grant from the Russian Foundation for Basic Research (N 08-04-00472).

## References

- Andreeva NA, Kulakovskaya TV & Kulaev IS (2006) High molecular mass exopolyphosphatase from the cytosol of the yeast *Saccharomyces cerevisiae* is encoded by the PPN1 gene. *Biochemistry (Moscow)* **71**: 975–977.
- De Deken RH (1966) The Crabtree effect: a regulatory system in yeast. *J Gen Microbiol* **44**: 149–156.
- Docampo R & Moreno SN (2001) The acidocalcisome. *Mol Biochem Parasitol* **114**: 151–159.
- Freimoser FM, Hurlimann HC, Jacob CA, Werner TP & Amrhein N (2006) Systematic screening of polyphosphate (poly P) levels in yeast mutant cells reveals strong interdependence with primary metabolism. *Genome Biol* **7**: R109.

- Kornberg A (1995) Inorganic polyphosphate: toward making a forgotten polymer unforgettable. *J Bacteriol* **177**: 491–496.
- Kulaev I, Vagabov V & Kulakovskaya T (1999) New aspects of polyphosphate metabolism and function. *J Biosci Bioeng* **88**: 111–129.
- Kulaev IS & Vagabov VM (1983) Polyphosphate metabolism in microorganisms. *Adv Microbiol Physiol* **24**: 83–171.
- Kulaev IS, Vagabov VM & Shabalin YA (1987) New data on biosynthesis of polyphosphates in yeasts. *Phosphate Metabolism and Cellular Regulation in Microorganisms* (Torriani-Gorini A, Rothman FG, Silver S, Wright A & Yagil E, eds), pp. 233–238. American Society of Microbiology, Washington DC.
- Kulaev IS, Vagabov VM & Kulakovskaya TV (2004) *The Biochemistry of Inorganic Polyphosphates*. Wiley, Chichester.
- Lichko LP, Kulakovskaya TV & Kulaev IS (2006) Inorganic polyphosphates and exopolyphosphatases in different cell compartments of *Saccharomyces cerevisiae*. *Biochemistry (Moscow)* **71**: 1171–1175.
- Liss E & Langen P (1962) Versuche zur Polyphosphat-Uberkompensation in Heffenzellen nach Phosphatverarmung. *Arch Microbiol* **41**: 383–392.
- McGrath JW, Kulakova AN, Kulakov LA & Quinn JP (2005) *In vitro* detection and characterisation of a polyphosphate synthesising activity in the yeast *Candida humicola* G-1. *Res Microbiol* **156**: 485–491.
- Merico A, Sulo P, Piškur J & Compagno C (2007) Fermentative lifestyle in yeast belonging to the *Saccharomyces* complex. *FEBS J* **274**: 1–14.
- Pepin CA & Wood HG (1986) Polyphosphate glucokinase from *Propionibacterium shermanii*: kinetics and demonstration that the mechanism involves both processive and nonprocessive type reactions. *J Biol Chem* **261**: 4476–4480.
- Pestov NA, Kulakovskaya TV & Kulaev IS (2004) Inorganic polyphosphate in mitochondria of *Saccharomyces cerevisiae* at phosphate limitation and phosphate excess. *FEMS Yeast Res* **4**: 643–648.
- Pronk JT, Steensma HY & van Dijken JP (1996) Pyruvate metabolism in *Saccharomyces cerevisiae*. *Yeast* **12**: 1607–1633.
- Reusch RN (1992) Biological complexes of poly- $\beta$ -hydroxybutyrate. *FEMS Rev* **103**: 119–130.
- Schuddemat J, de Boo R, van Leeuwen CCM, van den Broen PJA & van Steveninck J (1989) Polyphosphate synthesis in yeast. *Biochim Biophys Acta* **1010**: 191–198.
- Shabalin YA, Vagabov VM, Tsiomenko AB, Zemlianuhina OA & Kulaev IS (1977) Study of polyphosphate kinase activity in the yeast vacuoles. *Biokhimiya (Moscow)* **42**: 1642–1648.
- Trilisenko LV, Andreeva NA, Kulakovskaya TV, Vagabov VM & Kulaev IS (2003) Effect of inhibitors on polyphosphate metabolism in the yeast *Saccharomyces cerevisiae* under hypercompensation conditions. *Biochemistry (Moscow)* **68**: 577–581.
- Vagabov VM, Trilisenko LV, Shchivanova IN, Sibeldina LA & Kulaev IS (1998) Changes in inorganic polyphosphate length

- during the growth of *Saccharomyces cerevisiae*. *Microbiology (Moscow)* **67**: 188–193.
- Vagabov VM, Trilisenko LV & Kulaev IS (2000) Dependence of inorganic polyphosphate chain length on the ortho-phosphate content in the culture medium of the yeast *Saccharomyces cerevisiae*. *Biochemistry (Moscow)* **65**: 349–355.
- Weil-Malherbe H & Green RH (1951) The catalytic effect of molybdate on hydrolysis of organic phosphoric bonds. *Biochem J* **49**: 286–292.
- Zhang H, Ishige K & Kornberg A (2002) A polyphosphate kinase (PPK2) widely conserved in bacteria. *Proc Natl Acad Sci USA* **99**: 16678–16683.
